# Supplementary material
Source: PubMed Central journal article supplement (PMC3811746)
Supplement: IAI.00525-13_zii999090342so1.pdf [file IAI.00525-13_zii999090342so1.pdf]

## THP-1

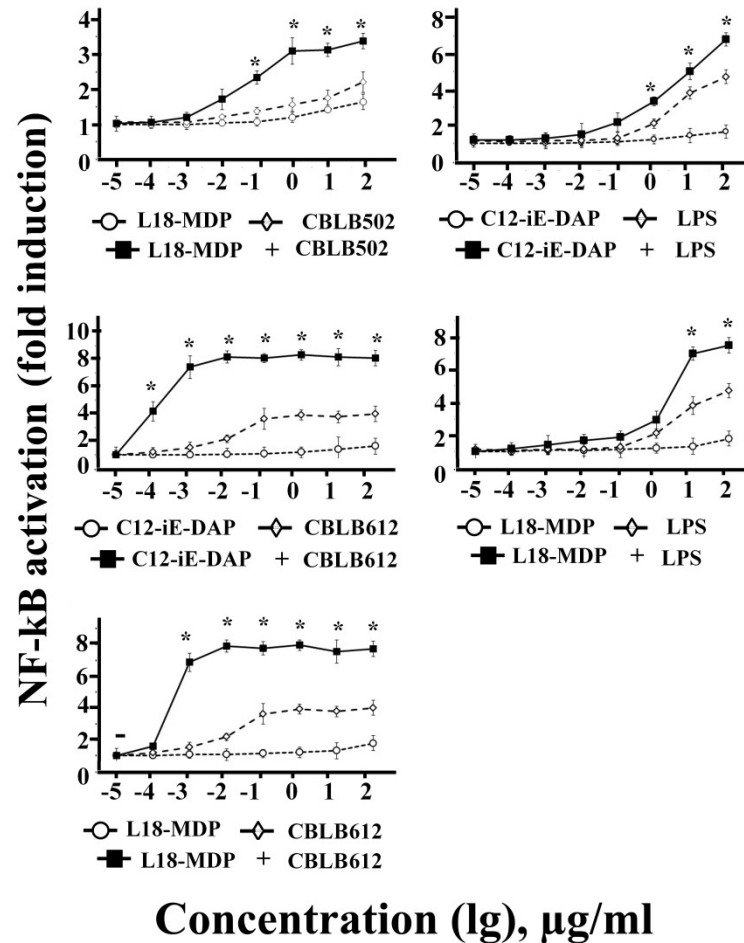

**Supplementary figure 1. Combined stimulation of NOD1,2 and TLR2,4,5 receptors leads to enhanced NF-kB activity in THP-1-CD14 cells.**

NF- $\kappa$ B activity in THP-1-CD14 cells 18h after addition of C12-iE-DAP or L18-MDP (open circles), CBLB502 or CBLB612 or LPS (open diamonds) and their combination (filled squares). For isolated PRR stimulation agonists were used in indicated concentrations ((lg)  $\mu$ g/ml). For combined PRR stimulation were used fixed concentrations of C12-iE-DAP (1 $\mu$ g/ml) and L18-MDP (1 $\mu$ g/ml) while concentrations of TLR agonists are indicated on x-axis. Results are expressed as an x-fold increase compared with the intact cells. Data are presented as mean  $\pm$  SD (Error bars) of 3 independent experiments performed in THP-1 in duplicates. Asterisks indicate significant differences (P < 0.05) in NF- $\kappa$ B activity levels between combined agonists administration and TLR or NOD agonist alone.

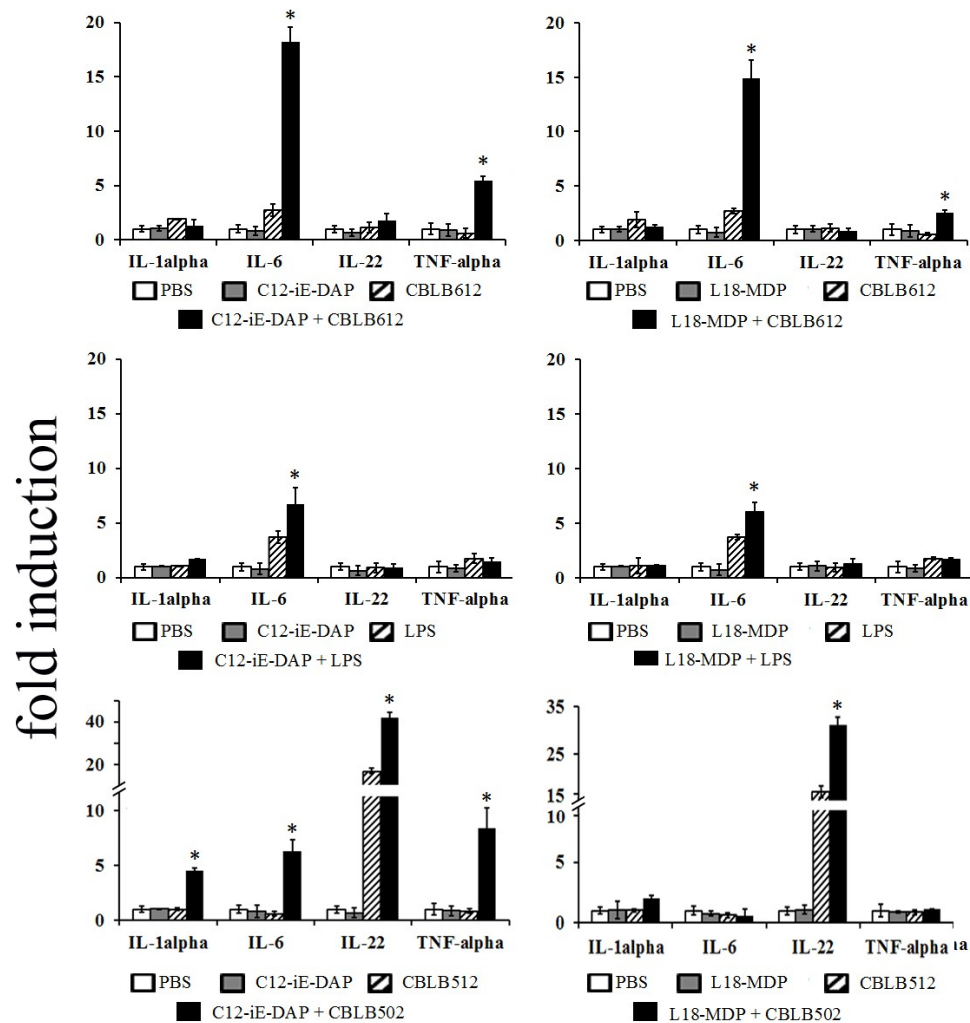

**Supplementary figure 2. Combined stimulation of NOD1,2 and TLR2,4,5 receptors leads to enhanced cytokine production in small intestine homogenates.**

Mice (n = 5 per group) were injected s.c. with PBS, CBLB612 (1  $\mu$ g/mouse), CBLB502 (1  $\mu$ g/mouse), LPS(1  $\mu$ g/mouse), C12-iE-DAP (200  $\mu$ g/mouse), L18-MDP (200  $\mu$ g/mouse) or their combination. Small intestine samples were collected 1 hour after PRR ligand administration. Concentrations of IL-1 $\alpha$ , IL-6, IL-22 and TNF $\alpha$  were measured in small intestine homogenates. The mean fold-change in cytokine concentration relative to the mean concentration in PBS-treated animals is shown. Error bars indicate SD. Asterisks indicate significant differences (P < 0.05) in NF-kB activity levels between combined PRR agonists administration and TLR or NOD agonist alone.

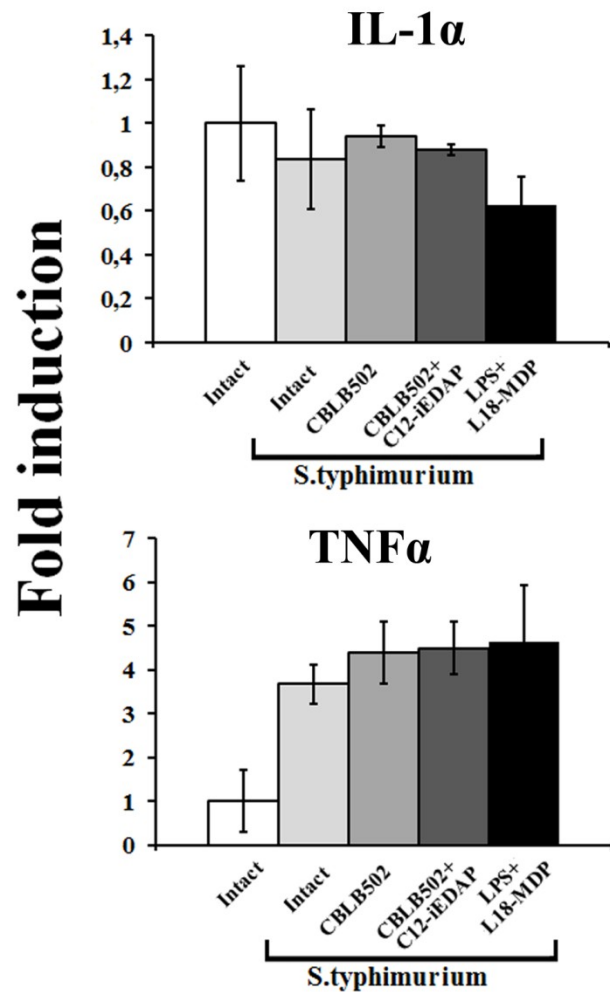

**Supplementary figure 3. Cytokine production in the small intestine of mice after combined stimulation of NOD1,2 and TLR4,5 receptors in the mouse infection model.**

Mice (n = 5 per group) were injected s.c. with PBS, CBLB502 (1  $\mu$ g/mouse) and combinations of C12-iE-DAP (200  $\mu$ g/mouse) and CBLB502, LPS (1  $\mu$ g/mouse) and L18-MDP (200  $\mu$ g/mouse). 9 hours after animals were orally infected with a lethal dose ( $5 \times 10^7$  CFU) of *Salmonella typhimurium*. Small intestine samples were collected 4 hour after infection (referred to acute phase of infection). Concentrations of IL-1 $\alpha$  and TNF $\alpha$  were measured in small intestine homogenates. The mean fold-changes in cytokine concentration of infected mice untreated and treated with PRR ligands are presented relative to the mean concentration in intact animals. Error bars indicate SD.
